# Supplementary material for: Lactobacillus casei reduces susceptibility to type 2 diabetes via microbiota-mediated body chloride ion influx
Source: PubMed Central journal article supplement — Sci Rep. 2014 Jul 18;4:5654. doi: 10.1038/srep05654 (PMC4135721; doi:10.1038/srep05654), 2014-07-18
Supplement: srep05654-s1.pdf [file srep05654-s1.pdf]

1 *Lactobacillus casei* reduces susceptibility to type 2 diabetes via  
2 microbiota-mediated body chloride ion influx  
3

4 Yong Zhang<sup>1</sup> Xiao Guo<sup>1</sup> Jianlin Guo<sup>1</sup>

5 Qiuwen He<sup>1</sup> He Li<sup>1</sup> Yuqin Song<sup>1</sup> Heping Zhang\*<sup>1</sup>

6  
7 **Supplemental Tables**

8  
9 Table S1 Primers for amplifying target intestinal bacteria  
10

| Bacterial Target                     | Primer   | Sequence (5'-3')          | Reference |
|--------------------------------------|----------|---------------------------|-----------|
| <i>C. scindens</i>                   | scindF   | GCAACCTGCCTGCACT          | 1         |
|                                      | scindR   | ACCGAATGGCCTTGCCA         |           |
| <i>C. sordellii</i>                  | sordF    | TCGAGCGACCTTCGG           |           |
|                                      | sordR    | CACCACCTGTCAC             |           |
| <i>C. coccoides-E. rectale</i> group | CEF      | CGGTACCTGACTAAGAAGC       | 2         |
|                                      | CER      | AGTTTCATTCTTGCGAACG       |           |
| <i>E. rectale</i>                    | RectaleF | CGGTACCTGACTAAGAAGC       | 3         |
|                                      | RectaleR | CCTAGTATTCATCGTTTACGGCGTG |           |
| <i>Lactobacillus</i>                 | Lac-F    | AGCAGTAGGGAATCTTCCA       |           |
|                                      | Lac-R    | CACCGCTACACATGGAG         |           |
| <i>Bifidobacterium</i>               | Bifid-F  | CTCCTGGAAACGGGTGG         | 4         |
|                                      | Bifid-R  | GGTGTCTTCCCGATATCTACA     |           |
| <i>Clostridium</i> cluster IV        | C4F      | TACCHRAGGAGGAAGCCAC       |           |
|                                      | C4R      | GTTCTTCCTAATCTCTACGCAT    |           |

11

12

13

14

15

16

17

18

Table S2 Primer sequences for real-time PCR

| Gene             | Primer   | Sequence (5'-3')           | Reference |
|------------------|----------|----------------------------|-----------|
| 18S              | 18SF     | TAAGTCCCTGCCCTTTGTACACA    | 5         |
|                  | 18SR     | ATCCGAGGGCCTCACTAAAC       |           |
| CIC1             | CIC1F    | TGTGGAACGCTCAGAACTGCAGTC   | 6         |
|                  | CIC1R    | TCTAGTGCCAAGACACCTCTGAGC   |           |
| CIC-2            | CIC-2F   | GCAGTGATTGTCTTCGAGCTCACCGG | 7         |
|                  | CIC-2R   | CCAGCTCAGGCAGGTAGGGCAGCT   |           |
| CIC-3            | CIC-3F   | TTGCCTACTATCACCACGAC       | 8         |
|                  | CIC-3R   | GCATCTCCAACCCATTTACT       |           |
| CIC4             | CIC4F    | GAGACTCGGAGCGTCTCATCGG     | 9         |
|                  | CIC4R    | CTGTTGGCAGGCAGCTCAGGAG     |           |
| CIC5             | CIC5F    | TGCTGACTGTCCTTACTCAG       |           |
|                  | CIC5R    | CAGGATGTTCCGAAGCTTCA       |           |
| CIC7             | CIC7F    | ATGAGCACGCCTGTGACCTGCCTG   | 10        |
|                  | CIC7R    | CGAGGAAGAGATGCCTCCTGTGGC   |           |
| GlyR $\alpha$ 1  | GlyR1F   | GCACCAAGCACTACAACAC        | 11        |
|                  | GlyR1R   | AGGACAGGATGACGATAAGC       |           |
| GABAA $\alpha$ 1 | GABAA1F  | CTCCTACAGCAACCAGCTATACCC   | 12        |
|                  | GABAA1R  | GCGGTTTTGTCTCAGGCTTGAC     |           |
| GABAA $\alpha$ 2 | GABAA2F  | AAGAGAAAGGCTCCGTCATG       |           |
|                  | GABAA2R  | GCTTCTTGTTGGTTCTGGAGTAG    |           |
| F4/80            | F4/80F   | ATGACCACACTTGCCATCCT       | 13        |
|                  | F4/80R   | GGCGAGTCGCTTCTAAGACA       |           |
| CD68             | CD68F    | TGGA CT CAGCAGCTCTACCA     |           |
|                  | CD68R    | CCTGTGGGTGGTCGTAGG         |           |
| CFTR             | CFTRF    | AATATCCTTAGCCCCTCGGA       | 14        |
|                  | CFTRR    | TGGTGGAACAATGGCACTA        |           |
| FoxA2            | FoxA2F   | GTATGCTGGGAGCCGTGAAG       | 15        |
|                  | FoxA2R   | AGCCTGCGCTCATGTTGC         |           |
| SLC26A3          | SLC26A3F | TTCTACCCTGTCTTCGTC         | 16        |
|                  | SLC26A3R | ACACCGTAGGAAATAGCG         |           |
| SLC26A6          | SLC26A6F | CGGGAGGCAACACGCAGAT        |           |
|                  | SLC26A6R | GGTGGCTGAGGAACGGAAGAC      |           |
| CYP7A1           | CYP7A1F  | GAGCTCATGCATGCCAATGAGAAGAG | 17        |
|                  | CYP7A1R  | AATCCACATACCTCAGAGC        |           |
| Bestrophin-3     | BEST3F   | CTCATCTCCAGCAGTGTCCA       | 18        |
|                  | BEST3R   | CAGATGAGGCGACTTGAGG        |           |
| TGR5             | TGR5F    | TTGCTCCTGTCAGTCTTGGCCTAT   | 19        |
|                  | TGR5R    | TTGGGTCTTCCTCGAAGCACTTGT   |           |
| T-BET            | T-BETF   | TCCTGTCTCCAGCCGTTTCT       |           |
|                  | T-BETR   | CGCTCACTGCTCGGA ACTCT      |           |
| GATA-3           | GATA-3 F | GGCGGCAGATGGTACTG          | 20        |
|                  | GATA-3 R | TCTGCCCATTCATTTTATGGTAGA   |           |

20 Supplemental Figures

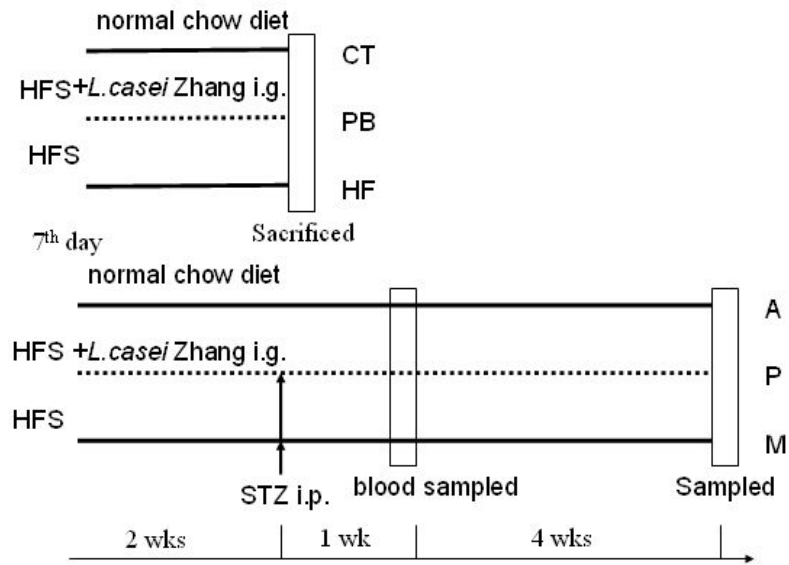

21

22

23

Fig. S1 Experimental design

24

25

26

27

28

29

30

31

32

33

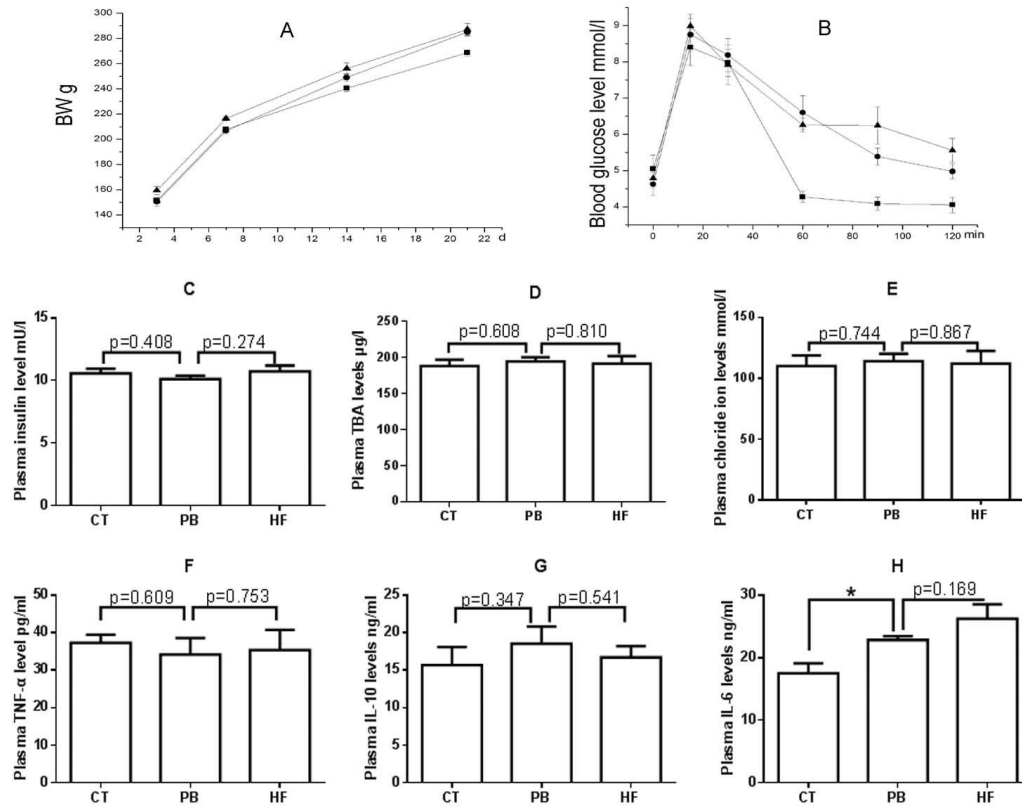

34

35 Fig. S2 Comparison of body weight (A), OGTT (B), plasma insulin levels (C), plasma TBA

36 levels (D), plasma chloride ion levels (E), plasma TNF- $\alpha$  levels (F), plasma IL-10 levels (G), and

37 plasma IL-6 levels (H) between different groups. Black triangles = HF group; black circles = PB

38 group; black squares = CT group. \* represents  $p < 0.05$ .

39

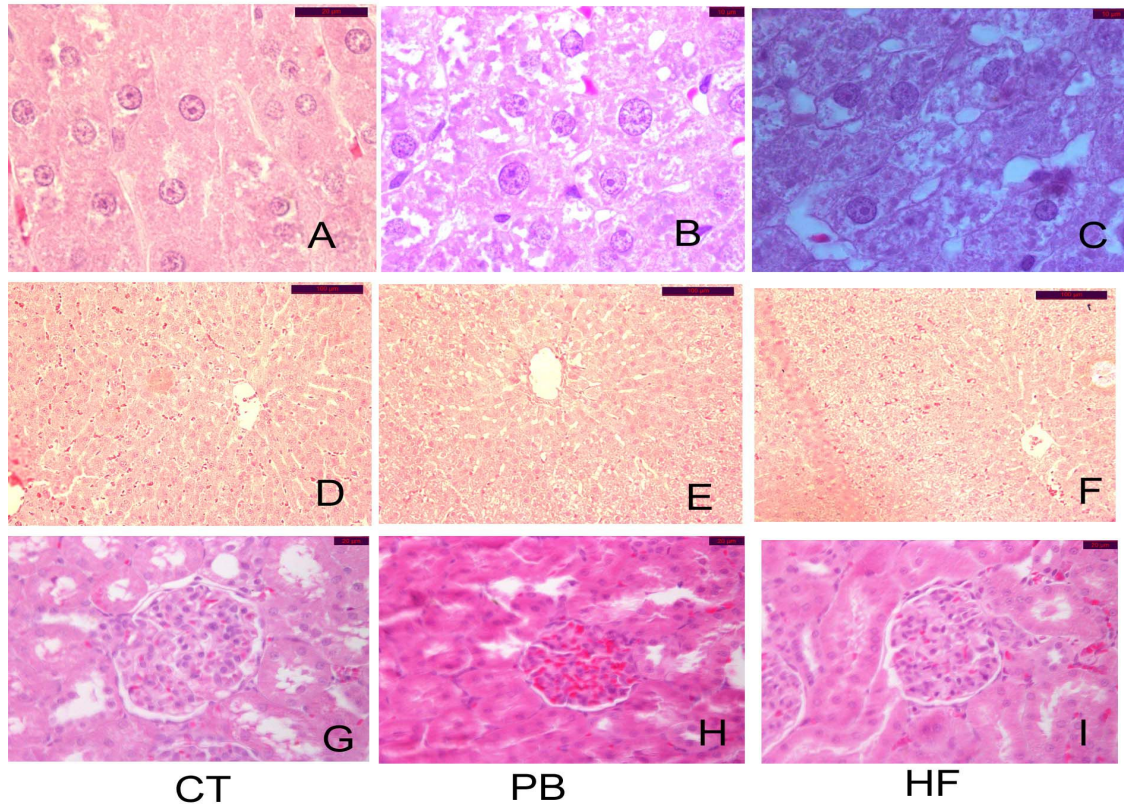

40

41

42

Fig. S3 Hepatic (A-F) and renal (G-I) tissue sections of three groups of rat

43

CT: A( $\times 1000$ ), D( $\times 200$ ), G( $\times 1000$ ); PB: B( $\times 1000$ ), E( $\times 200$ ), H( $\times 1000$ ); HF: C ( $\times 1000$ ), F ( $\times 200$ ), I ( $\times 1000$ ).

44

45

46

47

48

49

50

51

52

The CT rats exhibited an intact structure of hepatic lobule (A and D), whereas HF rats showed preliminary fatty liver morphology with compressed liver sinusoids, disarranged hepatic cords and large areas of fatty vacuolization but no inflammatory infiltration (C and F). Compared to HF rats, hepatic structure was clear and areas of fatty vacuolization were reduced in PB (B and E). No significant lesion was observed in renal glomerulus of all three groups (G, H and I). However, both the kidneys of PB and HF rats exhibited fewer renal tubular cavities (white areas) compared with the CT rats (G, H and I).

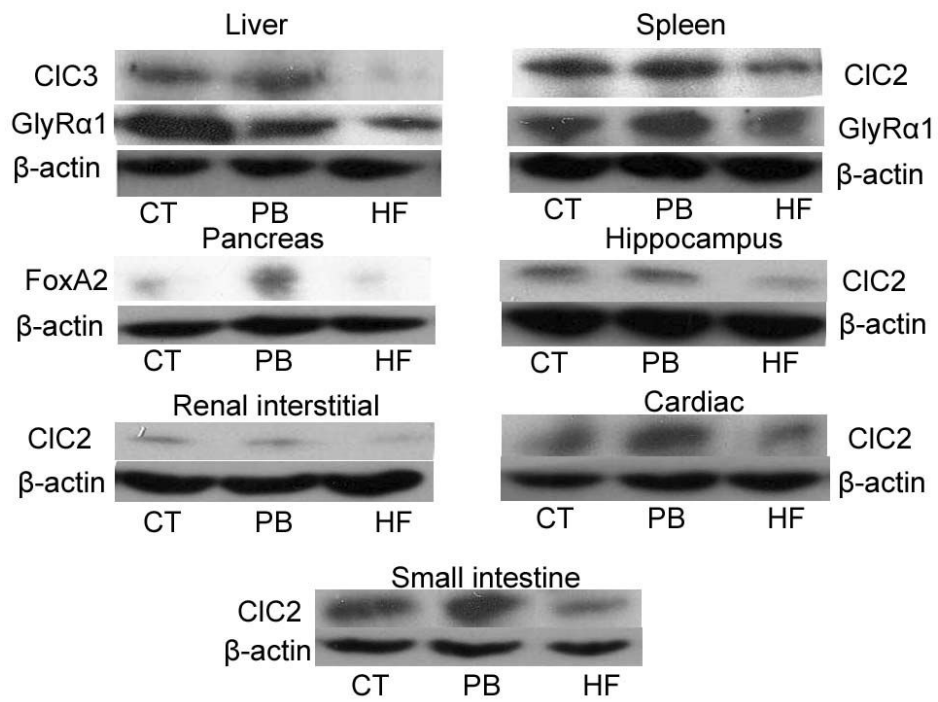

53

54 Fig. S4 The levels of target proteins in the three groups of rats

55

56

57

58

59

60

61

62

63

64

65

66 **Supplemental references**

- 67 1. Miyata, M., Yamakawa, H., Hamatsu, M., Kuribayashi, H., Takamatsu, Y., & Yamazoe, Y.  
68 Enterobacteria modulate intestinal bile acid transport and homeostasis through apical  
69 sodium-dependent bile acid transporter (SLC10A2) expression. *J. Pharmacol. Exp. Ther.* **336**,  
70 188-196 (2011).
- 71 2. Rinttilä, T., Kassinen, A., Malinen, E., Krogius, L. & Palva, A. Development of an extensive set  
72 of 16S rDNA-targeted primers for quantification of pathogenic and indigenous bacteria in faecal  
73 samples by real-time PCR. *J. Appl. Microbiol.* **97**,1166-117 (2004).
- 74 3. Ahmed, S., Macfarlane, G.T., Fite, A., McBain, A.J., Gilbert, P. & Macfarlane, S.  
75 Mucosa-associated bacterial diversity in relation to human terminal ileum and colonic biopsy  
76 samples. *Appl. Environ. Microbiol.* **73**,7435-7442 (2007).
- 77 4. Nakamura, N. et al. Molecular ecological analysis of fecal bacterial populations from term  
78 infants fed formula supplemented with selected blends of prebiotics. *Appl. Environ. Microbiol.*  
79 **75**,1121-1128 (2009).
- 80 5. Bhushan, S. Tchatalbachev, S. Klug, J. Fijak, M., Pineau, C., Chakraborty, T. & Meinhardt.  
81 A.Uropathogenic *Escherichia coli* block MyD88-dependent and activate MyD88-independent  
82 signaling pathways in rat testicular cells. *J. Immunol.* **180**,5537-5547 (2008).
- 83 7. Enz, R., Ross, B.J. & Cutting, G.R. Expression of the voltage-gated chloride channel ClC-2 in  
84 rod bipolar cells of the rat retina. *J. Neurosci.* **19**, 9841-9847 (1999).
- 85 8. Britton, F.C. et al. Functional characterization of novel alternatively spliced ClC-2 chloride  
86 channel variants in the heart. *J. Biol. Chem.* **280**, 25871-25880 (2005).
- 87 9. Mao, J. et al. Suppression of ClC-3 channel expression reduces migration of nasopharyngeal

88 carcinoma cells. *Biochem. Pharmacol.* **75**,1706-1716 (2008).

89 10. Kulka, M., Schwingshackl, A. & Befus, A.D. Mast cells express chloride channels of the ClC  
90 family. *Inflamm. Res.* **51**,451-456 (2002).

91 11. Yoshikawa, S., Oguchi, T., Funahashi, Y., de Groat, W.C. & Yoshimura, N. Glycine transporter  
92 type 2 (GlyT2) inhibitor ameliorates bladder overactivity and nociceptive behavior in rats. *Eur.*  
93 *Urol.* **62**, 704-712 (2012).

94 12. Mendu, S.K., Bhandage, A., Jin, Z. & Birmir, B. Different subtypes of GABA-A receptors are  
95 expressed in human, mouse and rat T lymphocytes. *PLoS One* **7**, e42959 (2012).

96 13. Huang, W. et al. Depletion of liver Kupffer cells prevents the development of diet-induced  
97 hepatic steatosis and insulin resistance. *Diabetes* **59**, 347-357 (2010).

98 14. Kanno, T. & Nishizaki, T. CFTR mediates noradrenaline-induced ATP efflux from DRG  
99 neurons. *Mol. Pain* **7**, 72 (2011).

100 15. Chen, F., Zhu, Y., Tang, X., Sun, Y., Jia, W., Sun, Y. & Han, X. Dynamic regulation of PDX-1  
101 and FoxO1 expression by FoxA2 in dexamethasone-induced pancreatic  $\beta$ -cells dysfunction.  
102 *Endocrinology* **152**, 1779-1788 (2011).

103 16. Zhang, G.H. et al. Dopamine stimulates Cl<sup>-</sup> absorption coupled with HCO<sub>3</sub><sup>-</sup> secretion in  
104 rat late distal colon. *Eur. J. Pharmacol.* **570**,188-195 (2007).

105 17. Pfaffl, M.W., Gerstmayer, B., Bosio, A. & Windisch, W. Effect of zinc deficiency on the  
106 mRNA expression pattern in liver and jejunum of adult rats: monitoring gene expression using  
107 cDNA microarrays combined with real-time RT-PCR. *J. Nutr. Biochem.* **14**, 691-702 (2003).

108 18. Lee, W.K., Chakraborty, P.K., Roussa, E., Wolff, N.A. & Thévenod, F. ERK1/2-dependent  
109 bestrophin-3 expression prevents ER-stress-induced cell death in renal epithelial cells by reducing



110 CHOP. *Biochim. Biophys. Acta* **1823**,1864-1876 (2012).

111 19. Xie, G., et al. Alteration of bile acid metabolism in the rat induced by chronic ethanol  
112 consumption. *FASEB J.* **27**,3583-3593 (2013).word pdf

113 20. Gremy, O., Benderitter, M., Linard, C. Acute and persisting Th2-like immune response after  
114 fractionated colorectal gamma-irradiation. *World J. Gastroenterol.* **14**,7075-7085 (2008).

115
